# Supplementary material
Source: PubMed Central journal article supplement (PMC5784810)
Supplement: NIHMS75075-supplement-1.pdf [file NIHMS75075-supplement-1.pdf]

### Supplementary Figure 1

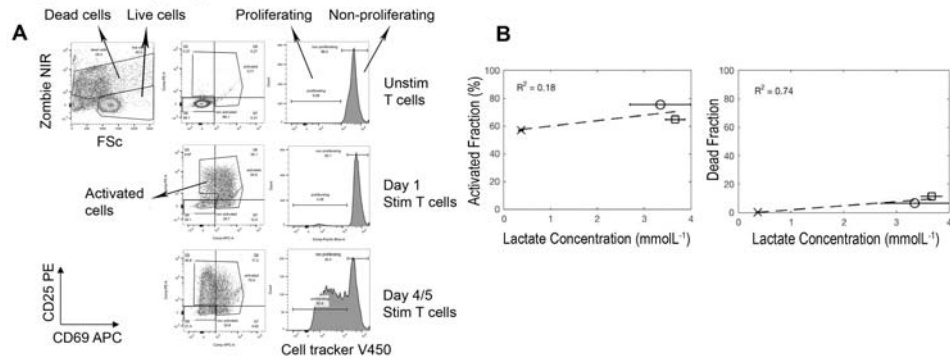

**Increased total extracellular lactate does not correlate with activated, non-proliferating fraction, nor with dead fraction.** Cell proliferation tracker V450 labelled T cells were cultured in the presence and absence of anti-CD3/28 dynabeads for 6 days. At days 1, 4 and 6, cell culture supernatants were taken for lactate analysis and cells were analysed by flow cytometry for activation status (cell proliferation low, high CD69-APC and CD25-PE) as well as counterstained with dead cell marker (zombie NIR). Flow was analysed on a BD Canto II and in flowjo version 10. The flow gating strategy is shown in A: dead cells, activated cells, proliferating and non-proliferating cells were gated. The correlation of total extracellular lactate concentration with activated, non-proliferating (left plot) and dead cells (right plot) is shown in B (correlations not statistically significant,  $p = 0.2$  and  $p = 0.375$ , respectively).

**Supplementary Figure 2**

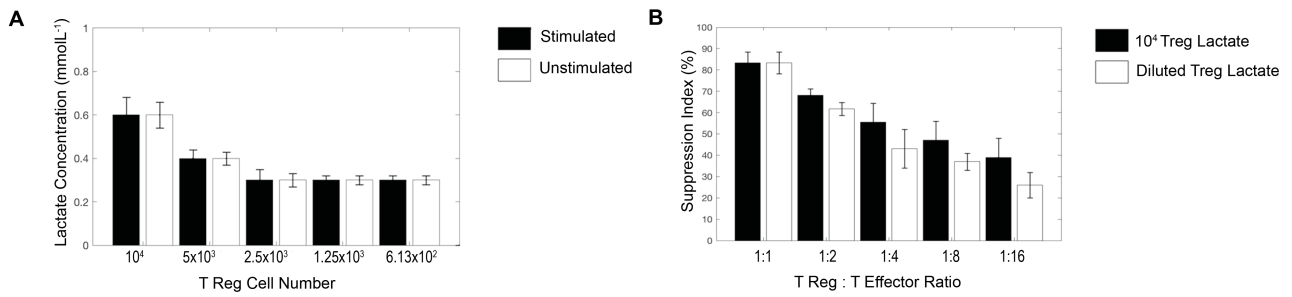

**Lactate does not increase with Treg stimulation and the suppression index (normally calculated by correcting for the amount of lactate produced by 10<sup>4</sup> Tregs) is not significantly altered by correcting for the amount of lactate produced by the exact number of Tregs in any given well.**

A: 10<sup>4</sup> T Regs, with subsequent dilutions, were cultured in RPMI with and without anti CD3/28. Supernatants were analysed at day 6, showing a small decrease in lactate with cell dilution. B: Shows the suppression index calculated by correcting for the amount of lactate produced by 10<sup>4</sup> Tregs (white bars) vs. correcting for the amount of lactate produced by the exact number of Tregs at any given dilution (black bars). No significant difference was seen
